# Supplementary material
Source: Springer Nature journal article supplement (https://www.springermedizin.de/resource/supplementary/12958_2003_51_MOESM7_ESM.pdf/9566266)

Myometrium

Placenta

kDa

P

C

P

C

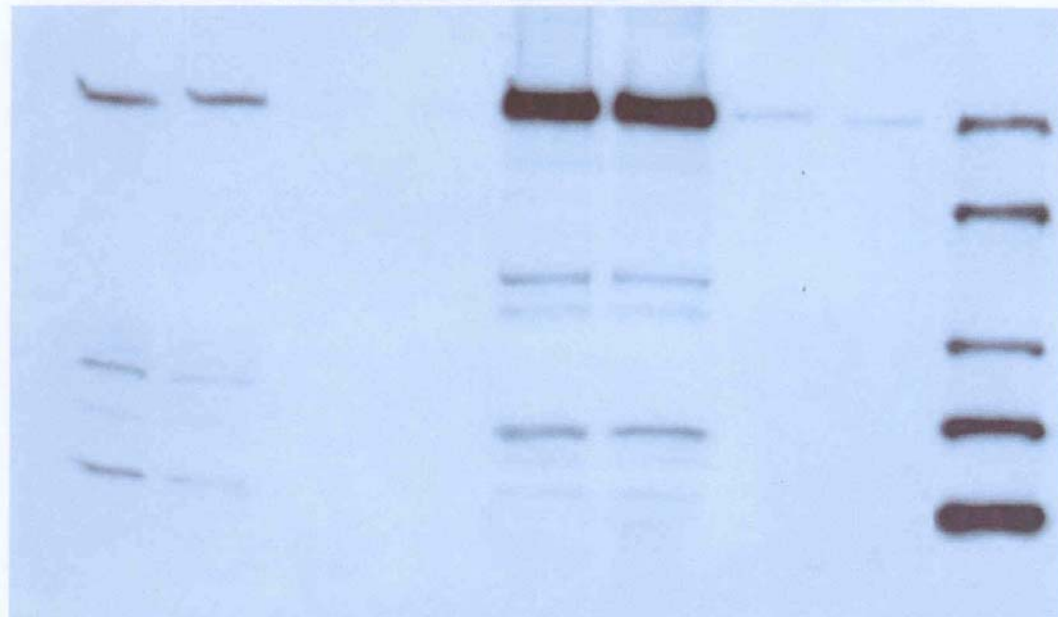

132

90

55

43

34-23

Supplement: MOESM7 [file 9566266]
